# Supplementary material
Source: MDPI journal article supplement (https://www.mdpi.com/1424-8247/17/1/117)
Supplement: s1 [file s1]

**Table S1.** Correlation analysis between ADCT and POEM, ADCT and DLQI and ADCT and Pruritus NRS at each time point.  $\rho_s$ , Spearman's rank correlation coefficient; PROs, patient-reported outcomes; P-NRS, Pruritus numerical rating scale; DLQI, dermatological life quality index; POEM, patient-oriented eczema measure; ADCT, Atopic Dermatitis Control Tool; T, time-point in months

| Time point | PROs correlated | $\rho_s$ | p-value | Time point | PROs correlated | $\rho_s$ | p-value |
|------------|-----------------|----------|---------|------------|-----------------|----------|---------|
| T0         | ADCT - POEM     | 0,172    | 0,054   | T24        | ADCT - POEM     | 0,667    | < 0,001 |
|            | ADCT - DLQI     | 0,316    | < 0,001 |            | ADCT - DLQI     | 0,710    | < 0,001 |
|            | ADCT - P-NRS    | 0,155    | 0,084   |            | ADCT - P-NRS    | 0,674    | < 0,001 |
| T1         | ADCT - POEM     | 0,558    | < 0,001 | T28        | ADCT - POEM     | 0,783    | < 0,001 |
|            | ADCT - DLQI     | 0,440    | < 0,001 |            | ADCT - DLQI     | 0,760    | < 0,001 |
|            | ADCT - P-NRS    | 0,465    | < 0,001 |            | ADCT - P-NRS    | 0,757    | < 0,001 |
| T4         | ADCT - POEM     | 0,582    | < 0,001 | T32        | ADCT - POEM     | 0,738    | < 0,001 |
|            | ADCT - DLQI     | 0,613    | < 0,001 |            | ADCT - DLQI     | 0,795    | < 0,001 |
|            | ADCT - P-NRS    | 0,404    | < 0,001 |            | ADCT - P-NRS    | 0,715    | < 0,001 |
| T8         | ADCT - POEM     | 0,581    | < 0,001 | T36        | ADCT - POEM     | 0,831    | < 0,001 |
|            | ADCT - DLQI     | 0,574    | < 0,001 |            | ADCT - DLQI     | 0,812    | < 0,001 |
|            | ADCT - P-NRS    | 0,454    | < 0,001 |            | ADCT - P-NRS    | 0,757    | < 0,001 |
| T12        | ADCT - POEM     | 0,545    | < 0,001 | T40        | ADCT - POEM     | 0,892    | < 0,001 |
|            | ADCT - DLQI     | 0,483    | < 0,001 |            | ADCT - DLQI     | 0,788    | < 0,001 |
|            | ADCT - P-NRS    | 0,429    | < 0,001 |            | ADCT - P-NRS    | 0,713    | < 0,001 |
| T16        | ADCT - POEM     | 0,649    | < 0,001 | T44        | ADCT - POEM     | 0,806    | < 0,001 |
|            | ADCT - DLQI     | 0,545    | < 0,001 |            | ADCT - DLQI     | 0,768    | < 0,001 |
|            | ADCT - P-NRS    | 0,594    | < 0,001 |            | ADCT - P-NRS    | 0,713    | < 0,001 |
| T20        | ADCT - POEM     | 0,616    | < 0,001 | T48        | ADCT - POEM     | 0,803    | < 0,001 |
|            | ADCT - DLQI     | 0,597    | < 0,001 |            | ADCT - DLQI     | 0,757    | < 0,001 |
|            | ADCT - P-NRS    | 0,629    | < 0,001 |            | ADCT - P-NRS    | 0,689    | < 0,001 |

**Table S2.** Univariate regression and multivariate regression analyses for Numerical Rating Scale Pruritus. AD, atopic dermatitis, PN, prurigo nodularis; y/o, years old; OR, odd ratio; C.I., confidence interval.

| Covariates                                              | Univariate analysis |             |         | Multivariate analysis |              |         |
|---------------------------------------------------------|---------------------|-------------|---------|-----------------------|--------------|---------|
|                                                         | OR                  | 95% C.I.    | p-value | OR                    | 95% C.I.     | p-value |
| <b>Baseline age</b> (over 60 y/o vs. under 60 y/o)      | 0,913               | 0,188-4,435 | 0,911   | 2,167                 | 0,276-17,018 | 0,462   |
| <b>AD onset</b> (late-onset vs. early-onset)            | 0,622               | 0,190-2,030 | 0,431   | 0,792                 | 0,184-3,415  | 0,754   |
| <b>Sex</b> (female vs. male)                            | 0,926               | 0,333-2,573 | 0,882   | 1,088                 | 0,373-3,173  | 0,877   |
| <b>Atopic comorbidities</b>                             |                     |             | 0,979   |                       |              | 0,948   |
| 1-2 comorbidities vs. 0 comorbidities                   | 1,167               | 0,272-4,999 | 0,836   | 1,015                 | 0,183-5,620  | 0,986   |
| ≥ 3 comorbidities vs. 0 comorbidities                   | 1,1111              | 0,267-4,623 | 0,885   | 0,847                 | 0,152-4,712  | 0,849   |
| <b>Sensitization to a contact allergen</b> (yes vs. no) | 1,000               | 0,301-3,321 | 1,0000  | 0,945                 | 0,266-3,355  | 0,931   |
| <b>AD phenotype</b>                                     |                     |             | 0,141   |                       |              | 0,412   |
| Other than classic and PN vs. classic                   | 1833                | 0,627-5,356 | 0,268   | 1,936                 | 0,641-5,848  | 0,242   |
| PN vs. classic                                          | 0,667               | 0,073-6,074 | 0,719   | 0,624                 | 0,052-7,525  | 0,710   |
| <b>Atopic family history</b> (yes vs. no)               | 2,118               | 0,763-5,883 | 0,150   | 2,209                 | 0,705-6,915  | 0,174   |
| <b>Intrinsic pattern vs. extrinsic pattern</b>          | 0,576               | 0,069-4,799 | 0,610   | 0,860                 | 0,064-11,497 | 0,910   |

**Table S3.** Univariate regression and multivariate regression analyses for POEM. AD, atopic dermatitis, PN, prurigo nodularis, y/o, years old; POEM, patient-oriented eczema measure; OR, odd ratio; C.I., confidence interval

| Covariates                                              | Univariate analysis |             |         | Multivariate analysis |              |         |
|---------------------------------------------------------|---------------------|-------------|---------|-----------------------|--------------|---------|
|                                                         | OR                  | 95% C.I.    | p-value | OR                    | 95% C.I.     | p-value |
| <b>Baseline age</b> (over 60 y/o vs. under 60 y/o)      | 1,655               | 0,478-5,732 | 0,427   | 2,699                 | 0,510-14,278 | 0,243   |
| <b>AD onset</b> (late-onset vs. early-onset)            | 1,510               | 0,595-3,834 | 0,386   | 1,638                 | 0,482-5,568  | 0,429   |
| <b>Sex</b> (female vs. male)                            | 0,857               | 0,343-2,141 | 0,741   | 1,011                 | 0,381-2,682  | 0,983   |
| <b>Atopic comorbidities</b>                             |                     |             | 0,885   |                       |              | 0,573   |
| 1-2 comorbidities vs. 0 comorbidities                   | 1,284               | 0,355-4,639 | 0,703   | 2,538                 | 0,448-14,397 | 0,293   |
| ≥ 3 comorbidities vs. 0 comorbidities                   | 1,033               | 0,288-3,702 | 0,961   | 2,107                 | 0,361-12,287 | 0,408   |
| <b>Sensitization to a contact allergen</b> (yes vs. no) | 0,904               | 0,304-2,686 | 0,856   | 0,665                 | 0,206-2,144  | 0,495   |
| <b>AD phenotype</b>                                     |                     |             | 0,237   |                       |              | 0,098   |
| Other than classic and PN vs. classic                   | 2,289               | 0,853-6,141 | 0,100   | 2,696                 | 0,959-7,580  | 0,060   |
| PN vs. classic                                          | 1,221               | 0,222-6,703 | 0,818   | 0,563                 | 0,079-3,987  | 0,565   |
| <b>Atopic family history</b> (yes vs. no)               | 1,030               | 0,422-2,515 | 0,948   | 1,406                 | 0,502-3,938  | 0,516   |
| <b>Intrinsic pattern vs. extrinsic pattern</b>          | 1,679               | 0,410-6,866 | 0,471   | 3,293                 | 0,435-24,939 | 0,249   |

**Table S4.** Univariate regression and multivariate regression analyses for ADCT. AD, atopic dermatitis, PN, prurigo nodularis; y/o, years old; ADCT, atopic dermatitis control tool; OR, odd ratio; C.I., confidence interval.

| Covariates                                              | Univariate analysis |             |         | Multivariate analysis |              |         |
|---------------------------------------------------------|---------------------|-------------|---------|-----------------------|--------------|---------|
|                                                         | OR                  | 95% C.I.    | p-value | OR                    | 95% C.I.     | p-value |
| <b>Baseline age</b> (over 60 y/o vs. under 60 y/o)      | 2,011               | 0,573-7,057 | 0,267   | 2,222                 | 0,425-11,605 | 0,344   |
| <b>AD onset</b> (late-onset vs. early-onset)            | 1,966               | 0,749-5,156 | 0,170   | 2,026                 | 0,588-6,985  | 0,264   |
| <b>Sex</b> (female vs. male)                            | 0,887               | 0,339-2,324 | 0,808   | 1,090                 | 0,393-3,025  | 0,869   |
| <b>Atopic comorbidities</b>                             |                     |             | 0,519   |                       |              | 0,740   |
| 1-2 comorbidities vs. 0 comorbidities                   | 0,853               | 0,250-2,913 | 0,799   | 1,277                 | 0,270-6,044  | 0,758   |
| ≥ 3 comorbidities vs. 0 comorbidities                   | 0,514               | 0,145-1,828 | 0,304   | 0,821                 | 0,162-4,163  | 0,812   |
| <b>Sensitization to a contact allergen</b> (yes vs. no) | 0,794               | 0,244-2,586 | 0,702   | 0,558                 | 0,158-1,967  | 0,364   |
| <b>AD phenotype</b>                                     |                     |             | 0,575   |                       |              | 0,255   |
| Other than classic and PN vs. classic                   | 1,714               | 0,621-4,735 | 0,298   | 2,026                 | 0,700-5,864  | 0,193   |
| PN vs. classic                                          | 1,221               | 0,222-6,703 | 0,818   | 0,511                 | 0,072-3,632  | 0,502   |
| <b>Atopic family history</b> (yes vs. no)               | 0,891               | 0,346-2,293 | 0,810   | 1,363                 | 0,458-4,053  | 0,578   |
| <b>Intrinsic pattern vs. extrinsic pattern</b>          | 2,021               | 0,489-8,352 | 0,331   | 1,954                 | 0,282-13,531 | 0,497   |
